# Supplementary material for: Interplay of a non-conjugative integrative element and a conjugative plasmid in the spread of antibiotic resistance via suicidal plasmid transfer from an aquaculture Vibrio isolate
Source: PubMed Central journal article supplement (PMC5991714; doi:10.1371/journal.pone.0198613), 2018-06-07
Supplement: pone.0198613.s002.pdf [file pone.0198613.s002.pdf]

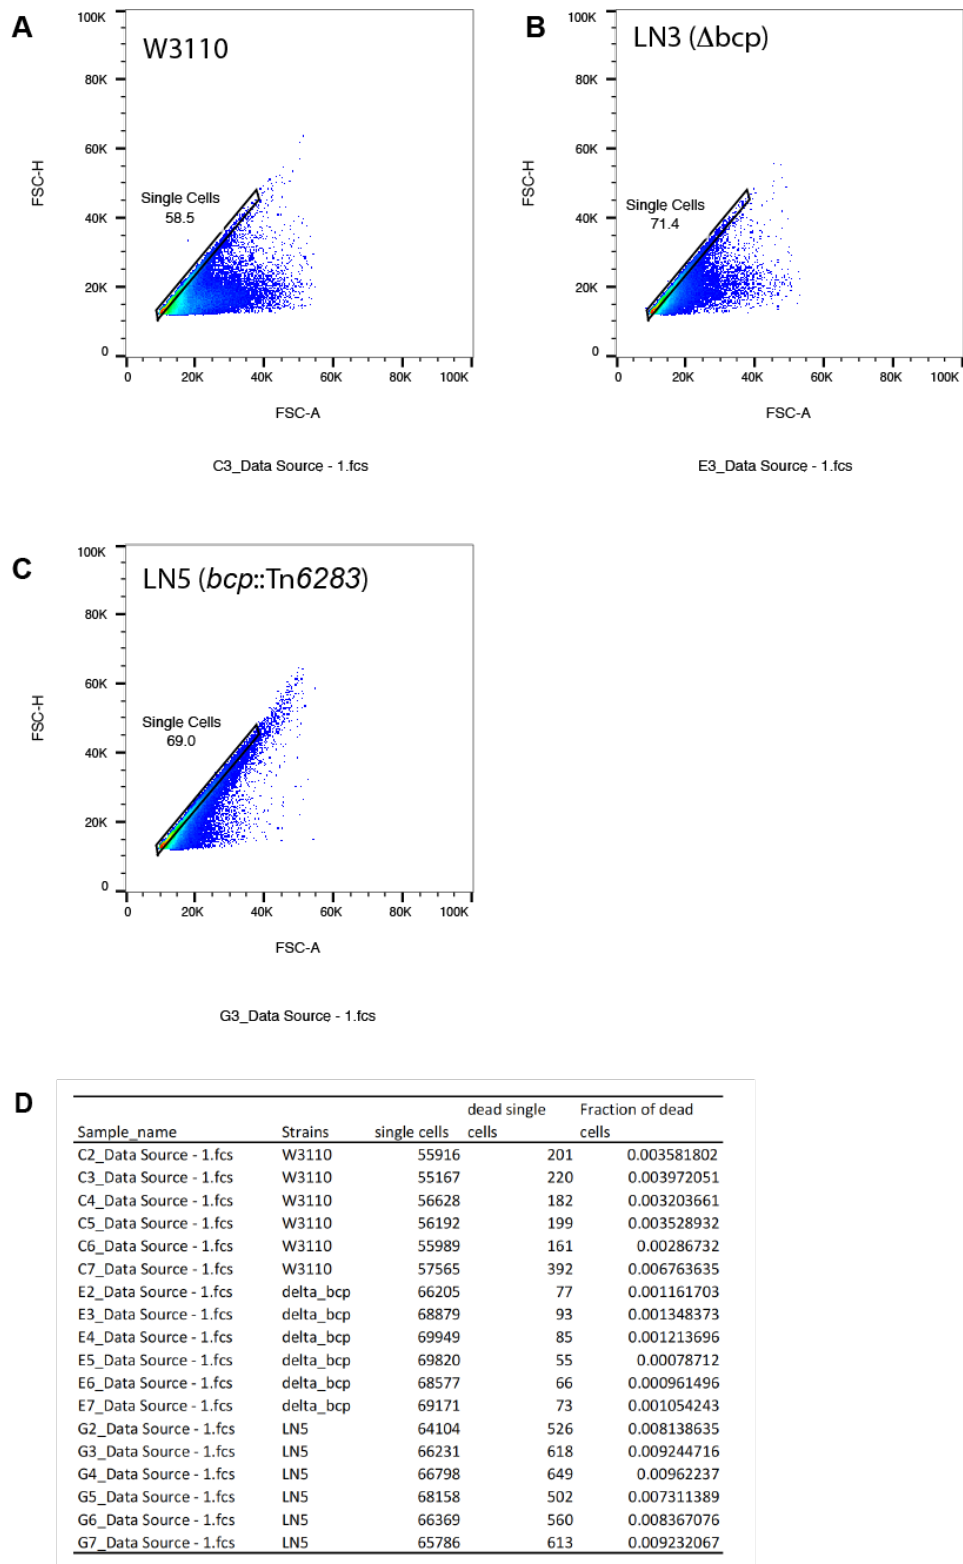

**S1 Fig. Selection of single cells in flow cytometry analysis.** (A) one representative data of W3110. (B) LN3. (C) LN5. Number of fluorescence-signal positive dead cells in the boxed area was count and summarized in (D).
