# Supplementary material for: Interplay of a non-conjugative integrative element and a conjugative plasmid in the spread of antibiotic resistance via suicidal plasmid transfer from an aquaculture Vibrio isolate
Source: PubMed Central journal article supplement (PMC5991714; doi:10.1371/journal.pone.0198613), 2018-06-07
Supplement: pone.0198613.s003.pdf [file pone.0198613.s003.pdf]

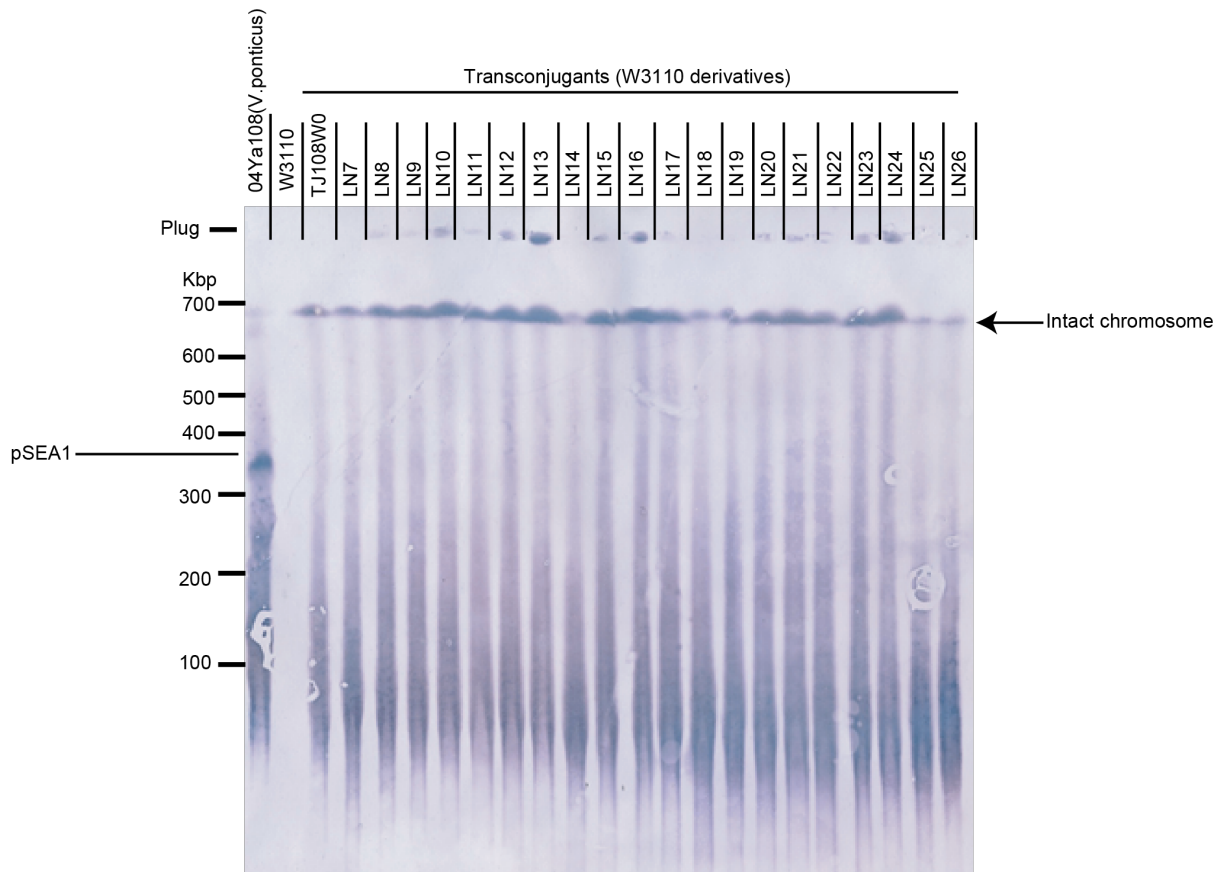

**S2 Fig. Southern hybridization analysis for the PFGE gel.** The *tet(M)* gene was used as a probe. The left two lanes are positive and negative controls for *tet(M)*; the other 21 lanes represent the total DNA from each transconjugant. Sizes shown in left correspond to the positions of linear size markers included in ProMega-Markers Lambda Ladders in the ethidium bromide strained gel.
