# Supplementary material for: Interplay of a non-conjugative integrative element and a conjugative plasmid in the spread of antibiotic resistance via suicidal plasmid transfer from an aquaculture Vibrio isolate
Source: PubMed Central journal article supplement (PMC5991714; doi:10.1371/journal.pone.0198613), 2018-06-07
Supplement: pone.0198613.s004.pdf [file pone.0198613.s004.pdf]

**pSEA1** : 71 DKEFDRIIRPIIHVIRYFMSLPASERHHHTDMSASLFFHSLQNTANIALAKYNS 124  
**ICE\_Vnig** : 71 DEQFNLIIRPILHHVIKYFMALPASERHHHTDMSASLFFHSLQNTANIALAKYNS 124  
**R391** : 60 QRDFQRLIQPCIDHLAAYVHLLPASEHHHSG-AGGLLRHSLEVAFWAAQAAEG 112  
**SXT** : 60 QREFQRLIQPCIDHLAAYVHLLPASEHHHSG-AGGLLRHSLEVAFWAAQAAEG 112  
**pAsa4** : 65 IEDFNRLVLPVIHRYAAFVHLLPASEAHHHRG-AGGLFRHGLEVAFWAAQASES 117  
**pIP1202** : 72 VDDFNRLVLPVIQRYAAFVHLLPASESHHHRG-AGGLFRHGLEVAFWAAQASES 124  
**pAQU1** : 70 QEEYDRLVMPVIGRYAAFVHLLPASEAHHHRG-AGGLFRHGLEVAFWATQASES 122  
**Pls\_Rhofe** : 85 NDDFERRYLAPLERRAAELINLI PATRDKHHTG-AGGLFRFAATMAIRSAQSADG 137  
**Pls\_Shesp** : 99 VYNAQTLVRDVVANFLSYAHLL PASENHHHAA-VGGLARHSLEVALFSLRHMAS 151  
**Chr\_Neigo** : 79 DENWSKDALPFLEKYIAFVQRL PASESHHHAG-DGGLVRRHTLDVAALALVASTS 131  
**pKLC102** : 55 KQQFEEIYRRPLANYAELVQQL PASENHHHAH-PGGMIDHGLEIVAYALKVRQT 107  
**PAGI-4\_C** : 24 KQQFEEIYRRPLANYAELVQQL PASENHHHAH-PGGMIDHGLEIVAYALKVRQT 76  
**clc** : 58 RKQFATLYRAPLERYAELVQRF PASEAHHHAY-PGGLMDHGLEIVAYALKLRQS 110  
**PAGI-3SG** : 58 RQQTALYLAPLERYASLVQAF PASESHHHAY-SGGLMDHGLEIVAYALKLRQS 110  
**PAGI-2\_C** : 58 RKQFAVLYRAPLERYAELVQAF PASESHHHAY-PGGLMDHGLEIVAYALKLRQS 110  
**pCAR1** :139 ASDLKLYVEPILVNFAELAHML PASENHHHSG-PGGLLRHSLEVASLTLDGCLT 191  
**R478** :106 AYTFTNLVKLPLVEYVRWIHLL PASENHHHNG-IGGLLSHSLEVAIISLKNANH 158  
**R27** :104 AYTFTNLVKLPLIEYIRWIHLL PASENHHHNG-IGGLLSHSLEVAMISLKNANH 156  
**Rts1** : 76 DAEYDEYIQPMLTNFANFVHLL PASEFHHHRA-QGGLLRHTLEVVLYSIKIAKS 128  
**pMAQU02** : 51 EQVWNKHLYAIEQFAELVQEV PASEIHHHSE-SGGLIDHTLEALYAGVRISQG 103  
**Consensus\_aa** : PASE HHH GGL H L  
**Consensus\_ss** : hhhhhhhhhhhhhhhhhhhhhhhhh hhhhhhhhhhhhhhhhhhhhhhhhh

**pSEA1** :132 IKIEHKNEYKHAAGVAVFLAALFHDAGKLFSDMSVYPSDEK 172  
**ICE\_Vnig** :132 IKIEHKNEYKHAASVAVFLAALFHDAGKLYSDMSVYPSDEK 172  
**R391** :119 GTPVEKKELEPRWRVAAALGGLFHDIGKPVSDLSITDEDGR 159  
**SXT** :119 GTPVEKKELEPRWRVAAALGGLFHDIGKPVSDLSITDEDGR 159  
**pAsa4** :124 GTPKQRRDNEPRWRLASCFSGLLHDVGKPLADVSIITDKNGV 164  
**pIP1202** :131 GTPRERRDNEPRWRLASCFSGLLHDVGKPLSDVSIITDKDGS 171  
**pAQU1** :129 GSPRERRRNEPRWRLACCFSGLLHDVGKPLSDVVITNSDGS 169  
**Pls\_Rhofe** :144 EGIERRRQTEAAWRHAAFLTGLTCELFRLPT-EMMIFDPKGN 184  
**Pls\_Shesp** :158 KFTDELHGKKIRWQYAAWVIGLVHDIGKALHDMTVQADDS- 197  
**Chr\_Neigo** :138 AKTEEIAKKTAVWRYGIMCAALLHDVGKTVT-GFQVELFDSA 178  
**pKLC102** :114 AAPESQSAQTEAWSAAAAYGALAHDLGKIVVDLQVELQDGS 154  
**PAGI-4\_C** : 83 AAPESQSAQAEAWSAAAAYGALAHDLGKIVVDLQVELQDGS 123  
**clc** :117 STPEDQAAQSEAWTAAVAYAALLHDVGKLAVDLHVELADGS 157  
**PAGI-3SG** :117 TTPEDQVIQAEAWTAATAIYAALLHDIGKVAVDLHVEYGDGS 157  
**PAGI-2\_C** :117 ASPEDQAAQAEAWTAAVAYAALLHDIGKIAVDLHVELADGS 157  
**pCAR1** :198 ETPARRSMRLRRWYVAGIASGLLHDAGKPLTDIRATDFEGN 238  
**R478** :165 GYQDEEVVRRKVYLYAAFICGLVHDAGKVYDLDIVSLNLASP 206  
**R27** :163 GYQDEEVVRRKVYLYAAFICGLVHDAGKVYDLDIVSLNLSET 204  
**Rts1** :135 ESPVIKSDRALAWRIAVVVGAVMHDIGKPISDVDVWDKSGE 175  
**pMAQU02** :110 AEPESIAESADRWRFAMIAI LSHDLGKIVTDIEVVYRLPE 150  
**Consensus\_aa** : L HD GK D  
**Consensus\_ss** : hhhhhhhhhhhhhhhhhhhhhhhhh eeee eeeeeee

**S3 Fig. Consensus sequence found in the secondary structure alignment of MOB<sub>H</sub> family relaxase.** Secondary structure alignment was generated using PROMAL3D. The plasmid sequenced in this study (pSEA1) is highlighted in light blue. Consensus\_ss: consensus secondary structure: h, alpha-helix; e, beta-sheet.
