# Supplementary material for: Interplay of a non-conjugative integrative element and a conjugative plasmid in the spread of antibiotic resistance via suicidal plasmid transfer from an aquaculture Vibrio isolate
Source: PubMed Central journal article supplement (PMC5991714; doi:10.1371/journal.pone.0198613), 2018-06-07
Supplement: pone.0198613.s007.pdf [file pone.0198613.s007.pdf]

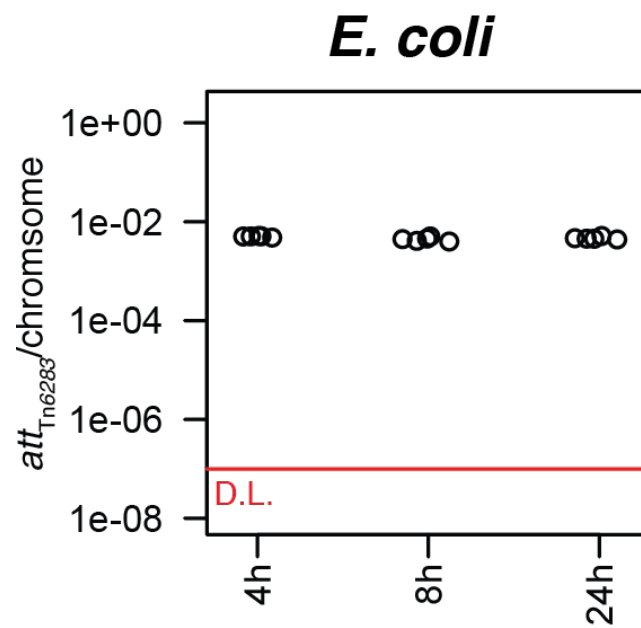

**S6 Fig. Tn6283 excision occurs independent of growth phase.** Five overnight cultures were respectively diluted by ~1000-fold in 50 ml LB in flasks, and then incubated up to 4, 8, or 24 hr (corresponding to each growth phase) with agitation. Copy number of  $att_{Tn6283}$  and  $dxs$  (chromosome) were determined using qPCR as described in the Materials and Methods. D.L.: detection limit.
