# Supplementary material for: Interplay of a non-conjugative integrative element and a conjugative plasmid in the spread of antibiotic resistance via suicidal plasmid transfer from an aquaculture Vibrio isolate
Source: PubMed Central journal article supplement (PMC5991714; doi:10.1371/journal.pone.0198613), 2018-06-07
Supplement: pone.0198613.s008.pdf [file pone.0198613.s008.pdf]

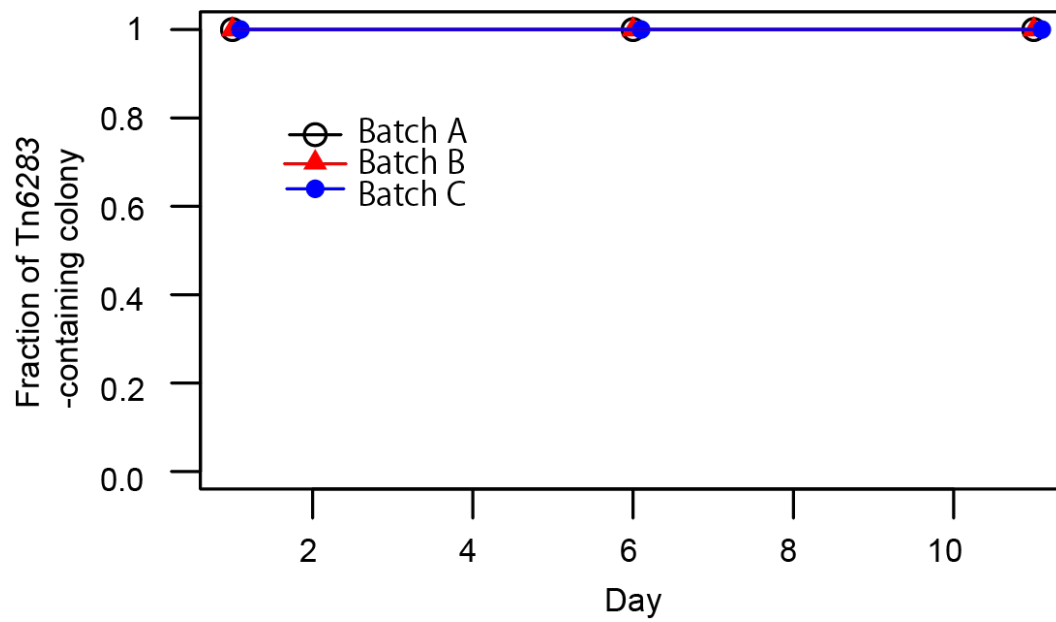

**S7 FIG. Stable maintenance of Tn6283 in the *E. coli* cell population.** In each assay, 40 colonies were investigated for the presence of a Tn6283–chromosome junction using PCR. Tn6283-free colonies were not detected throughout the experiment.
